# Supplementary material
Source: PubMed Central journal article supplement (PMC9683501)
Supplement: gbac033_suppl_supplementary_tables.pdf [file gbac033_suppl_supplementary_tables.pdf]

**Supplementary Table 1. Cronbach's Alpha Coefficients for Study Variables by Wave for Black Women and Men in the Health and Retirement Study (2006-2016)**

|                              | <i>Women (n = 1,558)</i> |             |             |             |             | <i>Men (n = 862)</i> |             |             |             |             |
|------------------------------|--------------------------|-------------|-------------|-------------|-------------|----------------------|-------------|-------------|-------------|-------------|
|                              | <i>2006</i>              | <i>2010</i> | <i>2012</i> | <i>2014</i> | <i>2016</i> | <i>2006</i>          | <i>2010</i> | <i>2012</i> | <i>2014</i> | <i>2016</i> |
| Chronic stress               | 0.67                     | 0.67        | 0.70        | 0.70        | 0.69        | 0.70                 | 0.68        | 0.65        | 0.74        | 0.71        |
| Everyday discrimination      | 0.74                     | 0.77        | 0.78        | 0.78        | 0.78        | 0.72                 | 0.82        | 0.84        | 0.84        | 0.85        |
| Neighborhood disorder        | 0.53                     | 0.78        | 0.81        | 0.81        | 0.81        | 0.60                 | 0.78        | 0.80        | 0.83        | 0.80        |
| Poor neighborhood cohesion   | 0.82                     | 0.83        | 0.86        | 0.84        | 0.86        | 0.77                 | 0.85        | 0.79        | 0.84        | 0.82        |
| Social support from spouse   | 0.78                     | 0.86        | 0.82        | 0.84        | 0.84        | 0.74                 | 0.73        | 0.76        | 0.81        | 0.69        |
| Social support from children | 0.83                     | 0.81        | 0.79        | 0.84        | 0.76        | 0.81                 | 0.83        | 0.79        | 0.78        | 0.79        |
| Social support from family   | 0.85                     | 0.84        | 0.84        | 0.86        | 0.80        | 0.85                 | 0.85        | 0.88        | 0.82        | 0.84        |
| Social support from friends  | 0.80                     | 0.81        | 0.83        | 0.82        | 0.81        | 0.82                 | 0.79        | 0.82        | 0.79        | 0.81        |
| Mastery                      | 0.87                     | 0.87        | 0.89        | 0.89        | 0.89        | 0.84                 | 0.86        | 0.89        | 0.90        | 0.88        |
| Religiosity/spirituality     | 0.87                     | 0.92        | 0.88        | 0.92        | 0.89        | 0.91                 | 0.92        | 0.94        | 0.92        | 0.91        |
| Sense of purpose             | 0.67                     | 0.72        | 0.74        | 0.71        | 0.69        | 0.74                 | 0.74        | 0.77        | 0.74        | 0.76        |

**Supplementary Table 2. Correlation Matrix of Study Variables among Black Americans in the Health and Retirement Study (2006-2016; n = 2,420)**

| Variables                         | (1)    | (2)    | (3)    | (4)    | (5)    | (6)    | (7)    | (8)    | (9)    | (10)   | (11)   | (12)   | (13)   | (14)   | (15)   | (16)   | (17)   | (18)   |        |
|-----------------------------------|--------|--------|--------|--------|--------|--------|--------|--------|--------|--------|--------|--------|--------|--------|--------|--------|--------|--------|--------|
| (1) Elevated CRP                  | 1.00   |        |        |        |        |        |        |        |        |        |        |        |        |        |        |        |        |        |        |
| (2) Age                           | 0.00   | 1.00   |        |        |        |        |        |        |        |        |        |        |        |        |        |        |        |        |        |
| (3) Woman                         | 0.13*  | -0.02  | 1.00   |        |        |        |        |        |        |        |        |        |        |        |        |        |        |        |        |
| (4) Rural                         | 0.04*  | 0.00   | 0.01   | 1.00   |        |        |        |        |        |        |        |        |        |        |        |        |        |        |        |
| (5) South                         | 0.04*  | -0.01  | 0.01   | 0.32*  | 1.00   |        |        |        |        |        |        |        |        |        |        |        |        |        |        |
| (6) Less than HS                  | 0.00   | 0.21*  | -0.04* | 0.12*  | 0.06*  | 1.00   |        |        |        |        |        |        |        |        |        |        |        |        |        |
| (7) HS/GED                        | 0.03   | -0.03  | -0.01  | 0.02   | 0.02   | -0.39* | 1.00   |        |        |        |        |        |        |        |        |        |        |        |        |
| (8) Some college                  | -0.03  | -0.15* | 0.04*  | -0.12* | -0.07* | -0.48* | -0.62* | 1.00   |        |        |        |        |        |        |        |        |        |        |        |
| (9) <= \$13,000                   | 0.05*  | 0.02   | 0.11*  | 0.06*  | 0.04*  | 0.24*  | 0.00   | -0.20* | 1.00   |        |        |        |        |        |        |        |        |        |        |
| (10) \$13,001-\$27,000            | 0.02   | 0.15*  | 0.06*  | 0.03*  | 0.00   | 0.08*  | 0.08*  | -0.15* | -0.34* | 1.00   |        |        |        |        |        |        |        |        |        |
| (11) \$27,001-\$55,000            | 0.00   | -0.02  | -0.04* | -0.01  | 0.01   | -0.10* | 0.06*  | 0.04*  | -0.34* | -0.33* | 1.00   |        |        |        |        |        |        |        |        |
| (12) > \$55,000                   | -0.07* | -0.15* | -0.12* | -0.08* | -0.05* | -0.22* | -0.14* | 0.32*  | -0.33* | -0.33* | -0.33* | 1.00   |        |        |        |        |        |        |        |
| (13) Insured                      | -0.05* | 0.19*  | -0.06* | -0.03  | 0.05*  | -0.15* | -0.05* | 0.18*  | -0.39* | 0.01   | 0.13*  | 0.25*  | 1.00   |        |        |        |        |        |        |
| (14) Medicaid                     | 0.06*  | -0.02  | 0.07*  | 0.02   | -0.07* | 0.16*  | 0.03   | -0.16* | 0.37*  | -0.01  | -0.15* | -0.22* | -0.74* | 1.00   |        |        |        |        |        |
| (15) Uninsured                    | 0.01   | -0.25* | 0.00   | 0.02   | 0.03   | 0.02   | 0.04*  | -0.06* | 0.11*  | -0.01  | 0.00   | -0.10* | -0.55* | -0.16* | 1.00   |        |        |        |        |
| (16) Never married                | -0.01  | -0.19* | 0.04*  | -0.06* | -0.08* | 0.03*  | -0.02  | -0.01  | 0.18*  | 0.00   | -0.07* | -0.12* | -0.17* | 0.11*  | 0.12*  | 1.00   |        |        |        |
| (17) Married                      | -0.05* | -0.03  | -0.22* | 0.05*  | 0.01   | -0.10* | 0.01   | 0.07*  | -0.34* | -0.10* | 0.10*  | 0.34*  | 0.18*  | -0.18* | -0.05* | -0.31* | 1.00   |        |        |
| (18) Divorced/Separated           | 0.02   | -0.11* | 0.06*  | -0.03  | 0.02   | -0.04* | 0.00   | 0.03   | 0.10*  | 0.03   | 0.00   | -0.13* | -0.09* | 0.06*  | 0.05*  | -0.22* | -0.52* | 1.00   |        |
| (19) Widowed                      | 0.05*  | 0.31*  | 0.19*  | 0.03   | 0.03   | 0.14*  | 0.00   | -0.12* | 0.16*  | 0.09*  | -0.07* | -0.19* | 0.01   | 0.06*  | -0.09* | -0.18* | -0.41* | -0.30* | 1.00   |
| (20) Chronic stress               | -0.01  | -0.18* | -0.01  | 0.01   | -0.03  | -0.01  | 0.04*  | -0.03  | 0.07*  | 0.01   | 0.00   | -0.09* | -0.14* | 0.11*  | 0.07*  | 0.05*  | -0.05* | 0.06*  | 0.06*  |
| (21) Financial difficulties       | 0.01   | -0.19* | 0.07*  | 0.05*  | 0.02   | 0.05*  | 0.05*  | -0.09* | 0.17*  | 0.06*  | -0.04* | -0.19* | -0.21* | 0.14*  | 0.14*  | 0.07*  | -0.10* | 0.05*  | 0.05*  |
| (22) Everyday discrimination      | -0.02  | -0.16* | -0.10* | 0.02   | 0.00   | -0.01  | 0.02   | -0.01  | 0.06*  | -0.03  | -0.03* | 0.00   | -0.08* | 0.07*  | 0.03*  | 0.05*  | -0.02  | 0.04*  | 0.04*  |
| (23) Neighborhood disorder        | 0.03*  | -0.02  | 0.04*  | -0.01  | -0.08* | 0.12*  | 0.04*  | -0.14* | 0.10*  | 0.06*  | -0.03  | -0.13* | -0.09* | 0.10*  | 0.10*  | 0.02   | 0.06*  | -0.08* | 0.01   |
| (24) Poor neighborhood cohesion   | 0.04*  | -0.08* | 0.02   | -0.01  | -0.04* | 0.09*  | 0.03   | -0.10* | 0.08*  | 0.03   | -0.03  | -0.09* | -0.09* | 0.10*  | 0.02   | 0.07*  | -0.07* | 0.03   | 0.03   |
| (25) Social support               | 0.01   | 0.10*  | 0.09*  | 0.00   | -0.02  | 0.00   | 0.02   | -0.02  | -0.03  | 0.00   | 0.01   | 0.02   | 0.05*  | -0.06* | 0.00   | -0.06* | 0.03   | -0.07* | -0.07* |
| (26) Religiosity/spirituality     | 0.06*  | 0.09*  | 0.09*  | 0.03   | 0.02   | 0.03   | 0.00   | -0.02  | 0.00   | 0.02   | 0.02   | -0.04* | 0.04*  | -0.03  | -0.03  | -0.05* | -0.01  | 0.00   | 0.00   |
| (27) Mastery                      | -0.05* | -0.08* | 0.01   | -0.03* | -0.02  | -0.09* | -0.01  | 0.09*  | -0.08* | -0.05* | 0.05*  | 0.08*  | 0.08*  | -0.11* | 0.02   | -0.02  | 0.02   | 0.01   | 0.01   |
| (28) Purpose in life              | -0.01  | -0.07* | 0.02   | -0.09* | -0.03  | -0.19* | -0.05* | 0.21*  | -0.16* | -0.09* | 0.03*  | 0.21*  | 0.14*  | -0.18* | 0.02   | -0.08* | 0.09*  | -0.02  | -0.02  |
| (29) CES-D                        | 0.03   | -0.10* | 0.08*  | 0.08*  | 0.04*  | 0.13*  | 0.04*  | -0.15* | 0.20*  | 0.08*  | -0.08* | -0.19* | -0.22* | 0.21*  | 0.07*  | 0.05*  | -0.14* | 0.09*  | 0.09*  |
| (30) Never smoker                 | -0.01  | 0.04*  | 0.16*  | 0.06*  | 0.05*  | -0.07* | -0.01  | 0.07*  | -0.06* | 0.01   | 0.00   | 0.05*  | 0.09*  | -0.05* | -0.06* | -0.05* | 0.09*  | -0.07* | -0.07* |
| (31) Past smoker                  | 0.02   | 0.14*  | -0.13* | -0.04* | -0.02  | 0.03   | -0.02  | 0.00   | -0.03* | -0.02  | 0.02   | 0.04*  | 0.08*  | -0.02  | -0.08* | -0.05* | 0.01   | 0.00   | 0.00   |
| (32) Current smoker               | -0.01  | -0.22* | -0.05* | -0.02  | -0.04* | 0.06*  | 0.04*  | -0.09* | 0.11*  | 0.02   | -0.01  | -0.12* | -0.20* | 0.09*  | 0.18*  | 0.12*  | -0.11* | 0.08*  | 0.08*  |
| (33) No alcohol consumption       | 0.05*  | 0.19*  | 0.16*  | 0.10*  | 0.03*  | 0.08*  | 0.00   | -0.06* | 0.04*  | 0.03*  | 0.02   | -0.10* | 0.01   | 0.06*  | -0.09* | -0.09* | 0.02   | -0.04* | -0.04* |
| (34) Moderate alcohol consumption | -0.05* | -0.13* | -0.06* | -0.10* | -0.02  | -0.11* | 0.00   | 0.10*  | -0.08* | -0.04* | -0.01  | 0.14*  | 0.04*  | -0.07* | 0.03   | 0.03   | 0.04*  | 0.01   | 0.01   |
| (35) Heavy alcohol consumption    | -0.02  | -0.13* | -0.18* | -0.02  | -0.03  | 0.04*  | 0.01   | -0.04* | 0.05*  | 0.00   | -0.01  | -0.03* | -0.07* | 0.00   | 0.11*  | 0.10*  | -0.08* | 0.04*  | 0.04*  |
| (36) Physical inactivity          | 0.08*  | 0.14*  | 0.14*  | 0.07*  | 0.02   | 0.09*  | 0.05*  | -0.13* | 0.10*  | 0.08*  | -0.03* | -0.15* | -0.09* | 0.12*  | -0.01  | 0.01   | -0.07* | 0.00   | 0.00   |
| (37) Overweight/obesity           | 0.17*  | -0.06* | 0.11*  | 0.03   | 0.01   | -0.03  | 0.02   | 0.01   | -0.06* | 0.00   | 0.02   | 0.04*  | 0.05*  | -0.01  | -0.07* | -0.05* | 0.03   | 0.00   | 0.00   |
| (38) Any ADLs                     | 0.10*  | 0.08*  | 0.06*  | 0.06*  | 0.01   | 0.10*  | 0.01   | -0.10* | 0.15*  | 0.09*  | -0.07* | -0.16* | -0.11* | 0.18*  | -0.06* | 0.01   | -0.08* | 0.05*  | 0.05*  |
| (39) Cholesterol medications      | -0.02  | 0.20*  | -0.07* | 0.00   | 0.02   | 0.08*  | 0.01   | -0.08* | 0.03   | 0.04*  | -0.04* | -0.02  | 0.04*  | 0.06*  | -0.12* | -0.07* | 0.02   | -0.04* | -0.04* |
| (40) Chronic conditions           | 0.11*  | 0.28*  | 0.06*  | 0.05*  | 0.01   | 0.11*  | 0.04*  | -0.13* | 0.11*  | 0.07*  | -0.05* | -0.13* | -0.03  | 0.16*  | -0.15* | -0.07* | -0.05* | 0.00   | 0.00   |

\* $p < 0.05$

| Variables                         | (19)   | (20)   | (21)   | (22)   | (23)   | (24)   | (25)   | (26)   | (27)   | (28)   | (29)   | (30)   | (31)   | (32)   | (33)   | (34)   | (35)   | (36)  | (37)  | (38)  | (39)  | (40) |
|-----------------------------------|--------|--------|--------|--------|--------|--------|--------|--------|--------|--------|--------|--------|--------|--------|--------|--------|--------|-------|-------|-------|-------|------|
| (1) Elevated CRP                  |        |        |        |        |        |        |        |        |        |        |        |        |        |        |        |        |        |       |       |       |       |      |
| (2) Age                           |        |        |        |        |        |        |        |        |        |        |        |        |        |        |        |        |        |       |       |       |       |      |
| (3) Woman                         |        |        |        |        |        |        |        |        |        |        |        |        |        |        |        |        |        |       |       |       |       |      |
| (4) Rural                         |        |        |        |        |        |        |        |        |        |        |        |        |        |        |        |        |        |       |       |       |       |      |
| (5) South                         |        |        |        |        |        |        |        |        |        |        |        |        |        |        |        |        |        |       |       |       |       |      |
| (6) Less than HS                  |        |        |        |        |        |        |        |        |        |        |        |        |        |        |        |        |        |       |       |       |       |      |
| (7) HS/GED                        |        |        |        |        |        |        |        |        |        |        |        |        |        |        |        |        |        |       |       |       |       |      |
| (8) Some college                  |        |        |        |        |        |        |        |        |        |        |        |        |        |        |        |        |        |       |       |       |       |      |
| (9) <= \$13,000                   |        |        |        |        |        |        |        |        |        |        |        |        |        |        |        |        |        |       |       |       |       |      |
| (10) \$13,001-\$27,000            |        |        |        |        |        |        |        |        |        |        |        |        |        |        |        |        |        |       |       |       |       |      |
| (11) \$27,001-\$55,000            |        |        |        |        |        |        |        |        |        |        |        |        |        |        |        |        |        |       |       |       |       |      |
| (12) > \$55,000                   |        |        |        |        |        |        |        |        |        |        |        |        |        |        |        |        |        |       |       |       |       |      |
| (13) Insured                      |        |        |        |        |        |        |        |        |        |        |        |        |        |        |        |        |        |       |       |       |       |      |
| (14) Medicaid                     |        |        |        |        |        |        |        |        |        |        |        |        |        |        |        |        |        |       |       |       |       |      |
| (15) Uninsured                    |        |        |        |        |        |        |        |        |        |        |        |        |        |        |        |        |        |       |       |       |       |      |
| (16) Never married                |        |        |        |        |        |        |        |        |        |        |        |        |        |        |        |        |        |       |       |       |       |      |
| (17) Married                      |        |        |        |        |        |        |        |        |        |        |        |        |        |        |        |        |        |       |       |       |       |      |
| (18) Divorced/Separated           |        |        |        |        |        |        |        |        |        |        |        |        |        |        |        |        |        |       |       |       |       |      |
| (19) Widowed                      | 1.00   |        |        |        |        |        |        |        |        |        |        |        |        |        |        |        |        |       |       |       |       |      |
| (20) Chronic stress               | -0.05* | 1.00   |        |        |        |        |        |        |        |        |        |        |        |        |        |        |        |       |       |       |       |      |
| (21) Financial difficulties       | 0.01   | 0.40*  | 1.00   |        |        |        |        |        |        |        |        |        |        |        |        |        |        |       |       |       |       |      |
| (22) Everyday discrimination      | -0.06* | 0.33*  | 0.20*  | 1.00   |        |        |        |        |        |        |        |        |        |        |        |        |        |       |       |       |       |      |
| (23) Neighborhood disorder        | 0.03*  | 0.15*  | 0.13*  | 0.10*  | 1.00   |        |        |        |        |        |        |        |        |        |        |        |        |       |       |       |       |      |
| (24) Poor neighborhood cohesion   | 0.00   | 0.17*  | 0.15*  | 0.14*  | 0.70*  | 1.00   |        |        |        |        |        |        |        |        |        |        |        |       |       |       |       |      |
| (25) Social support               | 0.09*  | -0.26* | -0.18* | -0.25* | -0.08* | -0.18* | 1.00   |        |        |        |        |        |        |        |        |        |        |       |       |       |       |      |
| (26) Religiosity/spirituality     | 0.05*  | -0.06* | 0.00   | -0.09* | 0.01   | -0.03  | 0.10*  | 1.00   |        |        |        |        |        |        |        |        |        |       |       |       |       |      |
| (27) Mastery                      | -0.02  | -0.17* | -0.16* | -0.18* | -0.09* | -0.10* | 0.18*  | 0.17*  | 1.00   |        |        |        |        |        |        |        |        |       |       |       |       |      |
| (28) Purpose in life              | -0.03  | -0.21* | -0.19* | -0.20* | -0.16* | -0.20* | 0.23*  | 0.15*  | 0.32*  | 1.00   |        |        |        |        |        |        |        |       |       |       |       |      |
| (29) CES-D                        | 0.04*  | 0.28*  | 0.28*  | 0.21*  | 0.13*  | 0.16*  | -0.21* | -0.05* | -0.17* | -0.32* | 1.00   |        |        |        |        |        |        |       |       |       |       |      |
| (30) Never smoker                 | 0.01   | -0.06* | -0.04* | -0.01  | -0.03  | -0.01  | 0.03   | 0.00   | 0.01   | 0.08*  | -0.08* | 1.00   |        |        |        |        |        |       |       |       |       |      |
| (31) Past smoker                  | 0.03   | -0.05* | -0.06* | -0.03  | -0.02  | -0.05* | 0.03   | 0.02   | 0.00   | 0.01   | -0.04* | -0.66* | 1.00   |        |        |        |        |       |       |       |       |      |
| (32) Current smoker               | -0.05* | 0.12*  | 0.12*  | 0.04*  | 0.06*  | 0.07*  | -0.07* | -0.02  | 0.00   | -0.10* | 0.15*  | -0.43* | -0.40* | 1.00   |        |        |        |       |       |       |       |      |
| (33) No alcohol consumption       | 0.09*  | -0.04* | 0.04*  | -0.03  | -0.01  | -0.01  | 0.03   | 0.06*  | -0.05* | -0.05* | 0.01   | 0.17*  | -0.01  | -0.19* | 1.00   |        |        |       |       |       |       |      |
| (34) Moderate alcohol consumption | -0.09* | 0.00   | -0.04* | 0.00   | -0.02  | -0.01  | 0.01   | -0.03  | 0.03   | 0.08*  | -0.04* | -0.09* | 0.04*  | 0.06*  | -0.79* | 1.00   |        |       |       |       |       |      |
| (35) Heavy alcohol consumption    | -0.02  | 0.06*  | 0.01   | 0.04*  | 0.05*  | 0.04*  | -0.06* | -0.06* | 0.04*  | -0.05* | 0.05*  | -0.15* | -0.04* | 0.23*  | -0.47* | -0.16* | 1.00   |       |       |       |       |      |
| (36) Physical inactivity          | 0.09*  | 0.06*  | 0.07*  | -0.02  | 0.05*  | 0.06*  | -0.08* | 0.04*  | -0.11* | -0.21* | 0.21*  | -0.02  | 0.00   | 0.03   | 0.11*  | -0.09* | -0.05* | 1.00  |       |       |       |      |
| (37) Overweight/obesity           | 0.00   | 0.00   | 0.00   | -0.02  | -0.01  | 0.00   | 0.03   | -0.02  | -0.02  | 0.01   | -0.02  | 0.06*  | 0.06*  | -0.15* | 0.10*  | -0.04* | -0.10* | 0.02  | 1.00  |       |       |      |
| (38) Any ADLs                     | 0.04*  | 0.16*  | 0.16*  | 0.06*  | 0.06*  | 0.06*  | -0.09* | -0.02  | -0.17* | -0.19* | 0.36*  | -0.07* | 0.04*  | 0.04*  | 0.07*  | -0.07* | -0.01  | 0.28* | 0.05* | 1.00  |       |      |
| (39) Cholesterol medications      | 0.08*  | 0.01   | -0.05* | -0.04* | 0.00   | -0.03  | 0.04*  | 0.00   | -0.07* | -0.04* | 0.04*  | -0.04* | 0.11*  | -0.08* | 0.09*  | -0.07* | -0.06* | 0.06* | 0.09* | 0.09* | 1.00  |      |
| (40) Chronic conditions           | 0.11*  | 0.14*  | 0.05*  | 0.02   | 0.07*  | 0.06*  | -0.05* | 0.03   | -0.17* | -0.18* | 0.22*  | -0.06* | 0.11*  | -0.06* | 0.14*  | -0.10* | -0.09* | 0.20* | 0.12* | 0.33* | 0.41* | 1.00 |
